# Effects of water decontamination methods and bedding material on the gut microbiota

Willie A. Bidot<sup>1</sup>, Aaron C. Ericsson<sup>1,2,3</sup>, and Craig L. Franklin<sup>1,2,3\*</sup>

<sup>1</sup> Comparative Medicine Program, University of Missouri, Columbia, Missouri, United States of America

<sup>2</sup> University of Missouri Metagenomics Center, University of Missouri, Columbia, Missouri, United States of America

<sup>3</sup> Mutant Mouse Resource & Research Center, University of Missouri, Columbia, Missouri, United States of America

\*Corresponding author

E-mail: [franklinc@missouri.edu](mailto:franklinc@missouri.edu) (CF)

## 30 **Abstract**

31 Rodent models are invaluable to understanding health and disease in many areas of biomedical  
32 research. Unfortunately, many models suffer from lack of phenotype reproducibility. Our  
33 laboratory has shown that differences in gut microbiota (GM) can modulate phenotypes of  
34 models of colon cancer and inflammatory bowel disease. We and others have also shown that  
35 a number of factors associated with rodent research, including vendor, cage system, and  
36 bedding can alter GM. The objective of this study was to expand these studies to examine the  
37 effect of additional bedding materials and methods of water decontamination on GM diversity  
38 and composition. To this end, Crl:CD1 (ICR) mice were housed on corn cob or compressed  
39 paper chip bedding and provided water that was decontaminated by four commonly used  
40 procedures: reverse osmosis, autoclaving, sulfuric acid treatment, or hydrochloric acid  
41 treatment. Feces was collected at day 0, and at day 28 (endpoint), fecal and cecal samples  
42 were collected. DNA was extracted from samples, amplified by PCR using conserved bacterial  
43 primer sets and subjected to next generation sequencing. Sequence data were analyzed using  
44 Qiime and groups were compared using principal coordinate analysis (PCoA) and permutational  
45 multivariate analysis of variance (PERMANOVA). Two factor PERMANOVA of cecal GM data  
46 revealed significant changes when comparing bedding and water decontamination methods,  
47 while no significant effects were noted in the fecal GM data. Subsequent PERMANOVA and  
48 PCoA of cecal data revealed that several combinations of bedding and water decontamination  
49 methods resulted in differing GM, highlighting the complexity by which environmental factors  
50 interact to modulate GM.

51

## 52 Introduction

53 In recent years there has been a substantial increase in studies focusing on the microorganisms  
54 present in the gastrointestinal tract (GIT). The gut microbiota (GM) is known to play crucial roles  
55 in digestion, immune status development, and pathogen resistance, and differences in GM have  
56 been associated with differences in health and disease susceptibility (1-3). Certain  
57 characteristics in the GM have been associated with diseases of the GIT (4), as well as  
58 diseases in other body systems such as the central nervous system (5, 6). Rodent models have  
59 emerged as a highly valuable tool to determine the role of the GM in both health and disease.  
60 Several studies have demonstrated that the highly dynamic GM is influenced by a variety of  
61 environmental factors, and can in turn impact rodent model phenotypes (7). Recently, the use of  
62 mouse models has been questioned due to the lack of reproducibility (8). These limitations have  
63 spurred efforts from several institutions such as the National Institutes of Health (NIH) to  
64 improve reproducibility of animal research (9). Our laboratory has focused on the microbial  
65 composition of the GIT as an important contributing factor in phenotypic variability of rodent  
66 disease models (10, 11). We previously found that the GM differs depending on the source and  
67 genetic background of the mouse (12). Even mice of genetically similar backgrounds from the  
68 same producer can have differing GM depending on the institution in which they are housed,  
69 suggesting that the environment is a major factor in the determination of the GM (13). We have  
70 also demonstrated significant changes in the GM in response to housing conditions (14), further  
71 corroborating the importance of environmental factors in shaping the GM. Given that the GM  
72 significantly impacts model phenotypes, these data substantiate the need to consider how  
73 different husbandry factors may influence the GM.

74 Husbandry factors such as light cycle, temperature, bedding, and handling can be seen  
75 as subtle factors that can affect the outcome of rodent experiments (7, 15). Factors such as

76 temperature and light cycle can be controlled by proper building maintenance. Bedding, a factor  
77 that is often overlooked, can greatly differ between facilities.

78 Another factor that can be overlooked is the water that is offered to rodents. Several  
79 water decontamination methods are commonplace in contemporary rodent facilities. Methods  
80 include filtering the water to physically remove contaminants (e.g., reverse osmosis), or  
81 procedures to kill bacteria (e.g., UV light or acidification). Differing water decontamination  
82 methods have been shown to impact model phenotypes. For example, the low pH of acidified  
83 water was associated with phenotype changes in a mouse diabetic model (16, 17). Moreover,  
84 water chlorination, when compared to tap water alone was shown to change the phenotype of a  
85 mouse model of colorectal cancer (18). It is unclear whether different water decontamination  
86 methods influence the GM, and in turn, become a potential experimental variable that  
87 contributes to inadequate reproducibility of model phenotypes.

88 Bedding is another component of husbandry that varies between animal facilities. Corn  
89 cob bedding is one of the most commonly used bedding materials because of its high  
90 absorbency (19) and low cost; however other paper-based bedding materials are becoming  
91 popular. Differing bedding materials have also been linked to model phenotype changes and  
92 changes in the GM (20, 21), but controlled studies have yet to be performed. To address how  
93 water decontamination and bedding shape the GM, we exposed mice to water decontaminated  
94 by four different methods: autoclaving with reverse osmosis (RO), autoclaving with hydrochloric  
95 acid (HCl), autoclaving with sulfuric acid (H<sub>2</sub>SO<sub>4</sub>), and autoclaving alone (Autoclaved). We also  
96 exposed the mice to two different bedding materials, corn cob and paperchip, and evaluated the  
97 interaction between water and bedding as drivers of GM composition change. Composition of  
98 the GM was determined by targeted amplicon sequencing using DNA extracted from feces and  
99 cecal content. Samples were collected upon arrival and four weeks after being exposed to either  
100 of the water and bedding combinations. Robust statistical methods then were used to determine  
101 main effects of, and interaction between water and bedding.

102           Understanding how husbandry factors, such as water decontamination or choice of  
103 bedding, can influence the GM is a critical first step toward improving reproducibility in animal  
104 models.

105

## 106 **Materials and Methods**

### 107 **Ethics statement**

108 This study was performed in accordance with the recommendations put forth in the Guide for  
109 the Care and Use of Laboratory Animals and were approved by the University of Missouri  
110 Institutional Animal Care and Use Committee (MU ACUC protocol #8720).

111

### 112 **Survey**

113 A water decontamination survey (S1 Table) was sent out on December 15, 2015 using the  
114 Compmed listserv (CompMed, AALAS, Memphis, TN), a listserv that is used for discussion of  
115 subjects of comparative medicine, laboratory animals, and topics related to biomedical  
116 research.

117 On March 21, 2016 a question survey about bedding was sent using the same email list. The  
118 survey included the following; “I am conducting a survey on the different types of bedding used  
119 in rodent facilities. Please send me a response with the type of bedding used in your facility.  
120 Specifics on the bedding will be appreciated (size, form, etc.)” Results from both surveys were  
121 recorded until the last response was received on March 29, 2016.

122

## 123 Mice

124 Six to eight week-old female outbred Crl:CD1 (ICR) mice ( $n = 96$ ) were purchased from Charles  
125 River Laboratories (Wilmington, MA) in a single order, and housed in the same room and  
126 maintained under barrier conditions in microisolator cages on individually ventilated cage-racks  
127 (Thoren, Hazleton, PA), filled with either compressed paper (Paperchip® Brand Laboratory  
128 Animal Bedding, Shepherd Specialty Papers, Watertown, TN) or corn cob bedding (Bed-o’Cobs  
129 1/8”, The Andersons Inc., Maumee, OH), with *ad libitum* access to autoclaved rodent chow  
130 (LabDiet 5008 Purina, St. Louis, MO) and water, under a 14:10 light/dark cycle. The cages  
131 contained a nestlet for enrichment and 4 mice per cage. The water offered was municipal water  
132 which was decontaminated using the methods explained below. Using a random number  
133 generator, mice were randomly assigned to one of the water and bedding combinations. Mice  
134 were determined to be free of overt and opportunist bacterial pathogens including *Citrobacter*  
135 *rodentium*, *Clostridium piliforme*, *Corynebacterium kutscheri*, *Helicobacter* spp., *Mycoplasma*  
136 spp., *Pasteurella pneumotropica*, *Pseudomonas aeruginosa*, *Salmonella* spp., *Streptococcus*  
137 *pneumoniae*; MHV, MVM, MPV, MNV, TMEV, EDIM, LCMV, MAV1, MAV2, Polyomavirus, PVM,  
138 REO3, Ectromelia virus, and Sendai virus; intestinal protozoa including *Spiroplasma muris*,  
139 *Giardia muris*, *Entamoeba muris*, trichomonads, and other large intestinal flagellates and  
140 amoeba; intestinal parasites including pinworms and tapeworms; and external parasites  
141 including all species of lice and mites, via quarterly sentinel testing performed by IDEXX  
142 BioResearch (Columbia, MO). At the end of study, mice were humanely euthanized via inhaled  
143 carbon dioxide, in accordance with the AVMA Guidelines for the Euthanasia of Animals: 2013  
144 Edition, followed by cervical dislocation as a secondary means.

145

## 146 Water decontamination methods

147 The four water decontamination methods selected were tap water (autoclaved), reverse  
148 osmosis, and acidification with either hydrochloric acid or sulfuric acid. Filled water bottles from  
149 all four groups were autoclaved prior to use. Reverse osmosis filtration used a Milli-Q® Direct  
150 system (Merck KGaA, Darmstadt, Germany). Acidification was performed using an automated  
151 bottle filler which titrated the water with sulfuric acid (model 9WEF, Tecniplast, Buguggiate,  
152 Italy) or hydrochloric acid (model Basil 1100, Steris Corporation, Mentor, OH) to a target pH of  
153 2.5 (range 2.3 to 2.7). Water pH was verified using a handheld pH meter (pHTestr® 10, Oakton  
154 Instruments, Vernon Hills, IL).

155

## 156 Sample collection

157 Freshly evacuated fecal pellets were obtained from each mouse on the day of arrival. These  
158 samples were collected by transferring each mouse to a separate clean microisolator cage  
159 containing no bedding, and allowing the mouse to defecate normally. Fecal pellets were then  
160 collected with a sterile wooden toothpick. At day 28 post-arrival mice were humanely euthanized  
161 and cecal and fecal samples were collected using aseptic technique. Briefly, each region of the  
162 gut was exteriorized to allow collection of samples from roughly the same site of each animal.  
163 Cecal samples comprised the entire cecal contents; and fecal samples represented the most  
164 distal fecal bolus present in the colon, excluding boli within the rectum proper. Instruments used  
165 for collection were flamed and allowed to cool between all samples. Following collection, all  
166 samples were placed in 2 mL round-bottom tubes containing a 0.5 cm diameter stainless steel  
167 bead. All samples were stored in a -80°C freezer until extraction was performed.

168

169 For DNA extraction, 800 µL of lysis buffer (22) was added to each tube containing the  
170 sample and then mechanically disrupted using a TissueLyser II (Qiagen, Venlo, Netherlands).

171 After mechanical disruption, tubes were incubated at 70°C for 20 minutes with periodic  
172 vortexing. Samples were then centrifuged at 5000×g for five minutes at room temperature, and  
173 the supernatant transferred to a clean 1.5 mL Eppendorf tube. Two hundred µL of 10 mM  
174 ammonium acetate was added to lysates, mixed thoroughly, incubated on ice for five minutes,  
175 and then centrifuged as above. Supernatant was then mixed thoroughly with one volume of  
176 chilled isopropanol and incubated on ice for 30 minutes. Samples were then centrifuged at  
177 16000×g for 15 minutes at 4°C. The supernatant was aspirated and discarded, and the DNA  
178 pellet washed several times with 70% ethanol and resuspended in 150 µL of Tris-EDTA. 15 µL  
179 of proteinase-K and 200 µL of Buffer AL (DNeasy Blood and Tissue kit, Qiagen) were added  
180 and samples were incubated at 70°C for 10 minutes. 200 µL of 100% ethanol was added and  
181 the contents of each tube were transferred to a spin column from the DNeasy kit. DNA was then  
182 purified according to the manufacturer's instructions and eluted in 200 µL of EB buffer (Qiagen).  
183 Purity of DNA was assessed via spectrophotometry (Nanodrop, Thermo Fisher Scientific,  
184 Waltham, MA); yield was determined via fluorometry (Qubit, Life Technologies, Carlsbad, CA)  
185 using quant-iT BR dsDNA reagent kit (Invitrogen, Carlsbad, CA).

186

## 187 16S rRNA library preparation and sequencing

188 The extracted DNA was amplified and sequenced at the University of Missouri DNA Core  
189 facility, as previously described (23). Briefly, an amplicon library of the V4 region of the 16S  
190 rRNA gene was generated using normalized DNA as a template. Using single-indexed universal  
191 primers (U515F/806R) flanked by Illumina standard adapter sequences with PCR parameters of  
192 98°C<sup>(3 m)</sup> + [98°C<sup>(15 s)</sup>+ 50°C<sup>(30 s)</sup> + 72°C<sup>(30 s)</sup>] × 25 cycles + 72°C<sup>(7 m)</sup>. Amplicons were then pooled  
193 for sequencing using Illumina MiSeq and V2 chemistry with 2x250 bp paired-end reads.

194



## 195 Informatics

196 All assembly, filtering, binning, and annotation of contiguous sequences was performed at the  
197 University of Missouri Informatics Research Core Facility, as previously described (23), with one  
198 exception: Operational taxonomic units (OTUs) were annotated using BLAST (24) against the  
199 SILVA database (25) of 16S rRNA sequences and taxonomy rather than the Greengenes  
200 database used in our previous studies.

201

## 202 Statistical Analysis

203 Samples receiving less than 10,000 sequence reads were omitted from analysis. Differences in  
204 beta-diversity of all groups were tested via a two-way and one-way PERMANOVA of ranked  
205 Bray-Curtis (shared abundances of OTUs) similarity index using the open access Past 3.14  
206 software package (26) . Principal coordinate analysis (PCoA) was also performed using the  
207 Past software package and the relative abundance data was fourth-root transformed to  
208 normalize the data. OTU richness and diversity indices were tested for normality using the  
209 Shapiro-Wilk method; differences were then tested via two-way ANOVA for normal data or  
210 Kruskal-Wallis ANOVA on ranks for non-normal data using SigmaPlot 12.3 (Systat Software  
211 Inc., San Jose, CA). Significant OTUs, hierarchical clustering, and random forest analysis were  
212 performed using cube root-transformed sequence data using open access MetaboAnalyst 3.0  
213 (<http://www.metaboanalyst.ca>) (27). We considered  $p$  values less than 0.05 significant.

214

## 215 Data availability

216 All reported data have been deposited in the National Center for Biotechnology Information  
217 (NCBI) Sequence Read Archive (SRA) under BioProject accession number PRJNA453789.

## 218 **Results**

### 219 **Water decontamination methods and bedding material survey results**

220 To determine what methods are being used in contemporary housing, two surveys were  
221 conducted. A survey was conducted to identify water decontamination methods that are  
222 available and being used across different rodent facilities (Fig 1A). A total of 39 responses from  
223 19 institutions were received and 13 different water decontamination methods were identified.  
224 The most common method used was reverse osmosis (RO) followed by acidification with  
225 hydrochloric acid. Autoclaving tap water was the third most common method and is a more  
226 popular practice in smaller rodent facilities. Acidifying the water as a whole is a very common  
227 practice, with a total of 10 facilities acidifying their water and three different acidifiers identified;  
228 hydrochloric, sulfuric, and phosphoric acid. Due to barrier restrictions within the vivarium in  
229 which these studies were conducted, water received by all groups was autoclaved, while certain  
230 mice received water that was also purified via RO or acidified via HCl or H<sub>2</sub>SO<sub>4</sub>.

231 **Fig 1. Water decontamination technique and bedding material surveys.** Results of surveys  
232 on different water decontamination techniques performed on December 2015 (A), and survey on  
233 different bedding materials performed on March 2016 (B). Surveys were performed through  
234 Compmed listserv. Darkened bars represent water and bedding used in this study.

235 A second survey was conducted to identify what bedding materials are being used in  
236 different rodent facilities (Fig 1B). A total of 11 institutions responded, with a total of 21  
237 responses. Corn cob bedding was the most common bedding material used (8/21), followed by  
238 aspen chip (5/21). Three different paper-based beddings were identified; alpha dri (3/21),  
239 carefresh (1/21), and paperchip (1/21). Based on availability at our institution, corn cob and  
240 paperchip were used, and eight groups of mice (2 beddings × 4 water treatments) were  
241 established in a fully crossed study design.

242 **Main effects of water decontamination methods and bedding material**

243 When subjectively evaluating the composition of the fecal samples, it is difficult to observe  
 244 distinct differences in relative abundance of OTUs (S1 Fig A). In contrast, subjective evaluation  
 245 of the composition of cecal samples revealed a water-treatment dependent pattern in the most  
 246 abundant OTUs such as UC Family Bacteroidales S24-7 1 and Lachnospiraceae NK4A136  
 247 group sp. 2 (S1 Fig B). For evaluation of the overall main effects of water decontamination  
 248 methods and bedding material on the GM composition, a two-way PERMANOVA of ranked  
 249 Bray-Curtis similarity index was performed (Table 1). Surprisingly, there were no significant  
 250 differences in the microbiota composition of the fecal samples (FM, fecal microbiota). However,  
 251 when cecal samples (CM, cecal microbiota) were examined, significant main effects were  
 252 detected in both water decontamination methods ( $p=0.001$ ) and bedding material ( $p=0.023$ ). To  
 253 evaluate all of the different water and bedding combinations, a one-way PERMANOVA with  
 254 pairwise comparison of cecal communities was performed (Table 2). Out of 28 comparisons, 16  
 255 (57%) were significantly different demonstrating the complexity by which water decontamination  
 256 and bedding interactions can influence microbiota.

257 **Table 1. Main effects of bedding and water treatment on the fecal and cecal microbiota.**

| Endpoint Data<br>Two-way Permutational Multivariate Analysis of Variance (PERMANOVA) |        |          |       |          |
|--------------------------------------------------------------------------------------|--------|----------|-------|----------|
| Source                                                                               | Fecal  |          | Cecal |          |
|                                                                                      | F      | <i>p</i> | F     | <i>p</i> |
| Bedding                                                                              | 1.74   | 0.117    | 2.52  | 0.023    |
| Water Decontamination Method                                                         | 0.712  | 0.626    | 4.16  | <0.001   |
| Interaction                                                                          | -0.500 | 0.095    | 0.24  | 0.106    |

258 Two-way PERMANOVA of ranked Bray-Curtis similarity indices results from endpoint (Day 28)  
 259 fecal and cecal samples. Considered  $p<0.05$  significant.  
 260

261 **Table 2. Pairwise PERMANOVA of Bray-Curtis similarity indices between cecal samples.**

|    | CH  | CR   | CS   | CA   | PH    | PR   | PS   | PA   |
|----|-----|------|------|------|-------|------|------|------|
| CH | $p$ | 3.40 | 2.90 | 1.13 | 1.393 | 5.93 | 2.92 | 0.65 |

|           |        |        |             |             |             |             |             |             |
|-----------|--------|--------|-------------|-------------|-------------|-------------|-------------|-------------|
| <b>CR</b> | 0.011  |        | <b>3.02</b> | <b>4.47</b> | <b>1.27</b> | <b>2.67</b> | <b>4.02</b> | <b>1.85</b> |
| <b>CS</b> | 0.020  | 0.015  |             | <b>4.52</b> | <b>1.33</b> | <b>2.18</b> | <b>0.66</b> | <b>1.65</b> |
| <b>CA</b> | 0.294  | 0.005  | 0.005       |             | <b>2.38</b> | <b>7.55</b> | <b>4.82</b> | <b>0.71</b> |
| <b>PH</b> | 0.188  | 0.236  | 0.213       | 0.047       |             | <b>2.14</b> | <b>1.56</b> | <b>0.78</b> |
| <b>PR</b> | <0.001 | 0.017  | 0.037       | <0.001      | 0.045       |             | <b>2.55</b> | <b>2.96</b> |
| <b>PS</b> | 0.010  | <0.001 | 0.737       | <0.001      | 0.128       | 0.014       |             | <b>1.73</b> |
| <b>PA</b> | 0.583  | 0.126  | 0.156       | 0.523       | 0.471       | 0.031       | 0.133       |             |

262 Results of one-way PERMANOVA pairwise comparisons from cecal samples. F values (bolded)  
263 shown on upper right and *p* values are shown on lower left. The first letter represents bedding  
264 and the second letter represents water decontamination technique; C- Corn cob, P- Paperchip,  
265 A- Autoclaved, H- Hydrochloric acid, R- Reverse osmosis, S- Sulfuric acid. Considered *p*<0.05  
266 significant.  
267

268 Differences in CM composition between groups were also visualized by PCoA. All  
269 comparisons except for one revealed separation of groups with some overlap in PCo1 vs PCo2.  
270 Fig 2 shows selected comparisons and further emphasizes the complexity of interaction  
271 between the two factors examined.

272  
273 **Fig 2. Principal Coordinate Analysis (PCoA) of pairwise comparisons of selected groups.**

274 PCoAs of comparisons between groups housed in corn cob bedding offered either reverse  
275 osmosis or autoclaved treated water (A), paperchip or corn cob bedding offered reverse  
276 osmosis or autoclaved treated water respectively (B), and corn cob or paperchip bedding  
277 offered reverse osmosis or H<sub>2</sub>SO<sub>4</sub> treated water respectively (C). Significant differences  
278 (*p*<0.05) in cecal microbiota composition between these group comparisons were detected via  
279 pairwise PERMANOVA (Table 2).

280

## 281 Differences in richness and alpha diversity

282 To measure richness of each group the number of distinct OTUs was counted for each sample.  
283 In both FM and CM there was a significant main effect of bedding on richness (S2 and S3  
284 Tables). Overall there was a significant decrease in number of OTUs (i.e., richness) in mice  
285 housed on paperchip bedding when compared to corn cob (Fig 3 A and B). In the FM, some

286 individual significant pairwise comparisons were demonstrated in groups offered the same water  
287 source but different beddings; HCl, RO, and H<sub>2</sub>SO<sub>4</sub> (Fig 3A). In the CM, there was also a  
288 significant main effect of water (S3 Table), and several pairwise comparisons were significantly  
289 different (Fig 3B). Within each bedding type, samples from mice receiving autoclaved water with  
290 no additional treatment had the lowest richness, suggesting that all additional treatment  
291 methods are associated with increased richness.

292

293 **Fig 3. Richness and diversity of fecal and cecal microbiota at endpoint.** Tukey's box plot of  
294 endpoint fecal and cecal Richness (number of distinct OTUs) (A and B), Shannon Diversity  
295 Index (C and D), and Simpson diversity index (E and F). Like letters indicate significantly  
296 ( $p < 0.05$ ) different comparisons via two-way ANOVA followed by Tukey's post hoc test. Bottom  
297 axis represents combination of bedding and water decontamination method: autoclaving with  
298 reverse osmosis (RO), autoclaving with hydrochloric acid (HCl), autoclaving with sulfuric acid  
299 (H<sub>2</sub>SO<sub>4</sub>), and autoclaving alone (Autoclaved).

300

301 Alpha diversity of the samples was calculated using the Shannon and Simpson diversity  
302 indices, which combine richness and evenness of the OTUs. No significant differences were  
303 observed in the FM in either of the diversity indices (S2 Table). In the CM however, there was a  
304 significant effect of water decontamination method (S3 Table) on  $\alpha$ -diversity, as measured via  
305 the Shannon index. In pairwise comparisons, several significant differences were demonstrated  
306 between groups housed with autoclaved or H<sub>2</sub>SO<sub>4</sub>-treated water and housed in paper or corn  
307 cob bedding (Fig 3D). That said, no significant differences were observed in Simpson diversity  
308 index of CM (Fig 3F). Collectively, these data indicate that both bedding and water treatment  
309 methods primary influence the richness, but not the distribution of the CM, and that the bedding  
310 dependent effects on richness are maintained in the FM.

311

## 312 Variation in OTU abundances and group clustering

313 A hierarchical cluster analyses was performed to demonstrate how individuals within  
314 experimental groups clustered according to the relative abundance of the 25 most variable  
315 OTUs as determined by ANOVA (S2 Fig). All cecal samples were represented in the analysis  
316 and were classified by treatment group. As in a PCoA, samples with similar composition cluster  
317 more closely to each other. Based on these most variable taxa, samples from several treatment  
318 groups clustered together loosely. Specifically, samples from the majority of mice receiving  
319 autoclaved water were grouped on one distal arm of the dendrogram, while samples from mice  
320 receiving RO-treated water formed a separate distinct branch.

321 We also performed a Random Forest (RF) analysis as a means to predict OTUs that  
322 were preferentially influenced by the different husbandry conditions (Fig 4). The analysis  
323 selected 15 OTUs as important classifiers for the different husbandry conditions. Additionally, a  
324 two-way ANOVA was performed to examine which factor influenced the relative abundance  
325 most and compare to the RF results. Fourteen of the 15 OTUs selected by the RF were  
326 significantly different in the two-way ANOVA (S4 Table). These OTUs (Family XIII UCG-001 sp.,  
327 *Lachnoclostridium* sp. 1, UC Family *Clostridiales* vadinBB60 group 1, *Akkermansia* sp.,  
328 *Ruminococcaceae* UCG-009 sp., *Ruminiclostridium* 5 sp. 4, UC Family *Clostridiales* vadinBB60  
329 group 3, UC Family *Peptococcaceae* 1, *Ruminiclostridium* 5 sp. 2, *Shuttleworthia* sp.,  
330 *Lactobacillus* sp., *Enterorhabdus* sp., UC Order *Mollicutes* RF9 1, and *Anaerostipes* sp.) were  
331 detected in both analyses and thus represent candidate taxa most influenced by the  
332 water/bedding combination. All OTUs determined to be different via ANOVA demonstrated a  
333 main effect of water-treatment (S4 Table). The water main effect was visualized in several  
334 OTUs with the RF analysis (Fig 4). For example, Family XIII UCG-001, *Akkermansia* sp., UC  
335 Family *Peptococcaceae* 1, and *Anaerostipes* were all most abundant in both groups receiving  
336 autoclaved water. *Enterorhabdus* was more abundant in both H<sub>2</sub>SO<sub>4</sub> water groups, and less

337 abundant in the RO groups. *Shuttleworthia* was more abundant in both H<sub>2</sub>SO<sub>4</sub> water groups,  
338 while least abundant in the autoclaved groups.

339

340 **Fig 4. Random forest analysis selection of operational taxonomic units (OTUs).**

341 Random forest analysis of the selected most important OTUs to classify groups. Scale on left  
342 represents abundance of OTUs in each group. Asterisks represent OTUs that were significant in  
343 two-way ANOVA (S3 Table).

344

345 Collectively, the data presented above show that bedding material and water  
346 decontamination methods can influence the GM of laboratory mice and that interactions exist  
347 between the two factors. As in other studies, these data also suggest that the CM is a more  
348 sensitive indicator of environmental effects on the gut microbiota, as compared to the FM.  
349 Specifically, while significant differences in richness were detected between treatment groups in  
350 both FM and CM, significant compositional differences were detected in only the CM. These  
351 findings reinforce the need to consider husbandry factors when comparing phenotypic data  
352 generated at different institutions or at different times, and to collect and analyze other gut  
353 regions when assessing the influence of environmental factors on the GM in general.

## 354 **Discussion**

355 There is growing evidence that variability in husbandry practices among rodent facilities can  
356 influence rodent GM. Moreover, differences in GM have been shown to modulate model  
357 phenotypes raising the possibility that these two factors are connected: differing husbandry yield  
358 changes in GM that subsequently impact model phenotypes. Given the current concerns about  
359 reproducibility of biomedical research models (9), studies further assessing this premise are

360 warranted. To the authors' knowledge, this study was the first survey of changes in the GM  
361 composition due to water decontamination methods and bedding material in research mice.  
362 Results of this study, showing that water decontamination methods and bedding material can  
363 change GM composition, provide additional potential sources of GM modulation that may in turn  
364 explain why rodent phenotypes differ when experiments are performed in different housing  
365 conditions.

366

367 As demonstrated in Fig 1, rodent facilities have a large variety of methods used for water  
368 decontamination. When water acidification was introduced, several studies were performed to  
369 assess animal health and reproduction with no adverse effects demonstrated (28, 29). One of  
370 the first physiological changes associated with acidified water was decreased weight gain and  
371 water consumption (30). Another study identified changes in immune responses when animals  
372 were offered water acidified to a pH of 2.0 (31). More recently, studies have shown both  
373 changes in GM and in disease model phenotypes as a result of water acidification (16, 17, 32).  
374 In humans, while water acidification is not a commonly used practice for preventing pathogen  
375 transmission, carbonated drinks can have a pH as low as 2.0, with no known immediate direct  
376 effects on health (33).

377

378 One intriguing aspect of the present results was that even though no significant  
379 differences were detected in the overall composition of the FM, there were significant  
380 differences in richness. The changes in FM may be subtle between groups, but when the FM  
381 from arrival was compared to that of endpoint there was a significant difference in composition  
382 (S3 Fig). The significant changes in the CM composition can be an indication that cecal content  
383 is a better sample for environmental influences on the GM. The demonstrated significant main  
384 effects of both bedding and water indicate that our husbandry practices do influence the GM.



385 The pairwise comparison (Table 2) also illustrated how different combinations of bedding and  
386 water can influence the GM.

387

388 Bedding material varies greatly between facilities, with corn cob bedding being a more  
389 popular choice, but paper based beddings are becoming increasingly common within the  
390 laboratory animal community. There are many possible reasons for corn cob to have an  
391 influence on the GM. Previous studies have demonstrated that different bedding materials do  
392 not alter the microenvironment parameters (ammonia levels, temperature, and humidity) in  
393 ventilated cages (34, 35), but there are other factors that could be influencing the changes in  
394 GM. It has been shown that mice and rats prefer alternative wood based beddings over corn  
395 cob bedding, and that corn cob can influence their sleeping habits (36-38). In a pre-diabetic  
396 mouse model, corn cob bedding reduced the efficiency of feed conversion when fed a high-fat  
397 diet (20). Corn cob bedding also contains endocrine-disrupting agents that can disrupt breeding  
398 behaviors in rats (39) and decrease aggressive behavior in the California mouse (*Peromyscus*  
399 *californicus*) (40). Other potential factors can be the greater amount of endotoxins and coliform  
400 levels present in corn cob bedding as compared to paper bedding (41). In a previous study  
401 evaluating the effects of changing husbandry conditions, mice switched from corn cob to a  
402 paper-based bedding demonstrated changes in microbiota composition at day 1 following the  
403 switch. However, at day 5 there were no detectable differences (21), suggesting a transient  
404 effect. While this husbandry change did not have a long-lasting effect on the FM, sampling of  
405 the cecum revealed readily detected changes.

406

407 When comparing beta diversity with PCoA, the plots with the most separation involved a  
408 group that was offered RO water (Fig 2), reflecting this treatment regimen's capacity to influence  
409 the GM. No clear explanation can be given as to why this was the case. However, when  
410 considering the mechanistic process of reverse osmosis, it is the only decontamination method

411 out of the four used that filters the water. The water passes through a membrane that is able to  
412 filter many compounds such as disinfectant byproducts, pesticides, endocrine-disrupting  
413 compounds, and pharmaceutical residues (42) that can potentially have a physiological  
414 influence on our rodents. This water filtration process can also filter out other compounds and  
415 minerals that would normally be available to the GM and therefore can directly influence the  
416 microbial content. Another interesting finding was that the autoclaved groups had a decreased  
417 richness of the CM when compared to all other groups. The fact that the water bottles for all  
418 groups were autoclaved in addition to other treatment in six of the groups (i.e. filtration or  
419 acidification), suggests that those additional treatments may inadvertently serve as a nidus for  
420 other bacteria or provide an environment fostering changes in the community composition.  
421 When evaluating  $\alpha$ -diversity, significant differences were limited to the CM and were only  
422 demonstrated in the Shannon diversity index (S3 Table). The Simpson diversity index is more  
423 sensitive to abundant species (43), and therefore taxonomic units of low abundance have a  
424 smaller impact on this index. Collectively, these findings suggest that lower abundance taxa  
425 played a lesser role in the differences seen among husbandry factor combinations.

426

427       Regarding the taxa putatively susceptible to the husbandry factors under investigation,  
428 RF and two-way ANOVA identified many of the same OTUs. A total of 26 OTUs were  
429 significantly different based on two-way ANOVA with  $p$  values corrected to account for multiple  
430 testing, all with a significant main effect of water. Fourteen of those 26 were identified in the RF  
431 analysis as significant classifiers for the specific water and bedding combination. Several of the  
432 OTUs represented as important classifiers were OTUs that have been associated with health  
433 and disease. The genus *Akkermansia*, known to modulate the immune system and associated  
434 with metabolic diseases such as obesity (44-47), was increased in groups receiving autoclaved  
435 water. An unclassified species of *Lactobacillus* was also selected as a classifier and the relative  
436 abundance was significantly different between groups, likely due to its low relative abundance in

437 samples from mice receiving RO-treated water. *Lactobacillus* is a genus that has gained  
438 attention through the years for its potential probiotic applications (48). In mice, certain  
439 *Lactobacillus* species have demonstrated the ability to stimulate an immunoregulatory response  
440 that allows the bacteria to persist in the bowel (49). Moreover, several *Lactobacillus* spp. have  
441 repeatedly been implicated as microbial determinants of cognitive function and behavior in  
442 mouse models (50-53) suggesting that husbandry factors affecting the GM are a critical  
443 consideration for investigators in the field of neuroscience and ethology.

444

445 In summary, water decontamination methods and bedding material used in rodent  
446 facilities can alter the GM and therefore must be considered when designing a study. Significant  
447 changes were primarily noted in cecal samples, confirming observations in previous studies (14)  
448 and suggesting that fecal sampling alone may be insufficient to unearth subtle changes in GM.  
449 Water decontamination methods vary within rodent facilities and can alter the GM composition,  
450 adding a potential variable to experimental outcomes. Accounting for and documenting these  
451 factors will aid in efforts to optimize reproducibility. It is therefore essential for investigators to  
452 provide full details as described in the ARRIVE guidelines (54) when writing a manuscript in  
453 order to increase reproducibility and ultimately translatability of our animal studies.

## 454 **Acknowledgments**

455 The authors would like to acknowledge Karen Clifford for assistance formatting figures and the  
456 staff at the University of Missouri DNA Core and Informatics Research Core facilities.

## 457 **Author Contributions**

458 Conceived and designed the experiments: WAB ACE CF. Performed the experiments: WAB.  
459 Analyzed the data: WAB. Contributed reagents/materials/analysis tools: ACE CF. Wrote the  
460 paper: WAB ACE CF.

## 461 **References**

- 462  
463 1. Kelly D, King T, Aminov R. Importance of microbial colonization of the gut in early life to the  
464 development of immunity. *Mutat Res.* 2007;622(1-2):58-69.  
465 2. Round JL, Mazmanian SK. The gut microbiota shapes intestinal immune responses during health  
466 and disease. *Nat Rev Immunol.* 2009;9(5):313-23.  
467 3. Sommer F, Backhed F. The gut microbiota--masters of host development and physiology. *Nat*  
468 *Rev Microbiol.* 2013;11(4):227-38.  
469 4. de Vos WM, de Vos EA. Role of the intestinal microbiome in health and disease: from correlation  
470 to causation. *Nutr Rev.* 2012;70 Suppl 1:S45-56.  
471 5. Cryan JF, Dinan TG. Mind-altering microorganisms: the impact of the gut microbiota on brain and  
472 behaviour. *Nat Rev Neurosci.* 2012;13(10):701-12.  
473 6. Dinan TG, Stilling RM, Stanton C, Cryan JF. Collective unconscious: how gut microbes shape  
474 human behavior. *J Psychiatr Res.* 2015;63:1-9.  
475 7. Franklin CL, Ericsson AC. Microbiota and reproducibility of rodent models. *Lab Anim (NY).*  
476 2017;46(4):114-22.  
477 8. Perrin S. Make mouse studies work. *Nature.* 2014;507(7493):423-5.  
478 9. Collins FS, Tabak LA. Policy: NIH plans to enhance reproducibility. *Nature.* 2014;505(7485):612-  
479 3.  
480 10. Hart ML, Ericsson AC, Franklin CL. Differing Complex Microbiota Alter Disease Severity of the IL-  
481 10-/- Mouse Model of Inflammatory Bowel Disease. *Front Microbiol.* 2017;8:792.  
482 11. Ericsson AC, Akter S, Hanson MM, Busi SB, Parker TW, Schehr RJ, et al. Differential  
483 susceptibility to colorectal cancer due to naturally occurring gut microbiota. *Oncotarget.*  
484 2015;6(32):33689-704.  
485 12. Ericsson AC, Davis JW, Spollen W, Bivens N, Givan S, Hagan CE, et al. Effects of vendor and  
486 genetic background on the composition of the fecal microbiota of inbred mice. *PLoS One.*  
487 2015;10(2):e0116704.  
488 13. Friswell MK, Gika H, Stratford IJ, Theodoridis G, Telfer B, Wilson ID, et al. Site and strain-specific  
489 variation in gut microbiota profiles and metabolism in experimental mice. *PLoS One.* 2010;5(1):e8584.  
490 14. Ericsson AC, Gagliardi J, Bouhan D, Spollen WG, Givan SA, Franklin CL. The influence of  
491 caging, bedding, and diet on the composition of the microbiota in different regions of the mouse gut. *Sci*  
492 *Rep.* 2018;8(1):4065.  
493 15. Servick K. Of mice and microbes. *Science.* 2016;353(6301):741-3.  
494 16. M. Hanief Sofi RG, 2 Subha Karumuthil-Meethil, 3 Nicolas Perez, 3 Benjamin M. Johnson, 1 and  
495 Chenthamarakshan Vasu 1,2. pH of Drinking Water Influences the Composition of Gut Microbiome and  
496 Type 1 Diabetes Incidence. *Diabetes.* 2014;63:632-44.  
497 17. Wolf KJ, Daft JG, Tanner SM, Hartmann R, Khafipour E, Lorenz RG. Consumption of acidic water  
498 alters the gut microbiome and decreases the risk of diabetes in NOD mice. *J Histochem Cytochem.*  
499 2014;62(4):237-50.  
500 18. Sasada T, Hinoi T, Saito Y, Adachi T, Takakura Y, Kawaguchi Y, et al. Chlorinated Water  
501 Modulates the Development of Colorectal Tumors with Chromosomal Instability and Gut Microbiota in  
502 *Apc*-Deficient Mice. *PLoS One.* 2015;10(7):e0132435.

- 503 19. Burn CC, Mason GJ. Absorbencies of six different rodent beddings: commercially advertised  
504 absorbencies are potentially misleading. *Lab Anim*. 2005;39(1):68-74.
- 505 20. Ambery AG, Tackett L, Penque BA, Hickman DL, Elmendorf JS. Effect of Corncob bedding on  
506 feed conversion efficiency in a high-fat diet-induced prediabetic model in C57Bl/6J mice. *J Am Assoc Lab*  
507 *Anim Sci*. 2014;53(5):449-51.
- 508 21. Ma BW, Bokulich NA, Castillo PA, Kananurak A, Underwood MA, Mills DA, et al. Routine habitat  
509 change: a source of unrecognized transient alteration of intestinal microbiota in laboratory mice. *PLoS*  
510 *One*. 2012;7(10):e47416.
- 511 22. Yu Z, Morrison M. Improved extraction of PCR-quality community DNA from digesta and fecal  
512 samples. *Biotechniques*. 2004;36(5):808-12.
- 513 23. Hart ML, Meyer A, Johnson PJ, Ericsson AC. Comparative Evaluation of DNA Extraction Methods  
514 from Feces of Multiple Host Species for Downstream Next-Generation Sequencing. *PLoS One*.  
515 2015;10(11):e0143334.
- 516 24. Altschul SF, Madden TL, Schaffer AA, Zhang J, Zhang Z, Miller W, et al. Gapped BLAST and  
517 PSI-BLAST: a new generation of protein database search programs. *Nucleic Acids Res*.  
518 1997;25(17):3389-402.
- 519 25. Quast C, Pruesse E, Yilmaz P, Gerken J, Schweer T, Yarza P, et al. The SILVA ribosomal RNA  
520 gene database project: improved data processing and web-based tools. *Nucleic Acids Res*.  
521 2013;41(Database issue):D590-6.
- 522 26. Hammer Ø, Harper, D.A.T., Ryan, P.D. PAST: Paleontological statistics software package for  
523 education and data analysis *Palaeontologia Electronica*; 2001.
- 524 27. Xia J, Sinelnikov IV, Han B, Wishart DS. MetaboAnalyst 3.0--making metabolomics more  
525 meaningful. *Nucleic Acids Res*. 2015;43(W1):W251-7.
- 526 28. Les EP. Effect of acidified-chlorinated water on reproduction in C3H-HeV and C57BL-5J mice.  
527 *Lab Anim Care*. 1968;18(2):210-3.
- 528 29. McPherson CW. Reduction of *Pseudomonas Aeruginosa* and Coliform Bacteria in Mouse  
529 Drinking Water Following Treatment with Hydrochloric Acid or Chlorine. *Lab Anim Care*. 1963;13:737-44.
- 530 30. Hall JE, White WJ, Lang CM. Acidification of drinking water: its effects on selected biologic  
531 phenomena in male mice. *Lab Anim Sci*. 1980;30(4 Pt 1):643-51.
- 532 31. Hermann LM, White WJ, Lang CM. Prolonged exposure to acid, chlorine, or tetracycline in the  
533 drinking water: effects on delayed-type hypersensitivity, hemagglutination titers, and reticuloendothelial  
534 clearance rates in mice. *Lab Anim Sci*. 1982;32(6):603-8.
- 535 32. Johnson BM, Gaudreau MC, Al-Gadban MM, Gudi R, Vasu C. Impact of dietary deviation on  
536 disease progression and gut microbiome composition in lupus-prone SNF1 mice. *Clin Exp Immunol*.  
537 2015;181(2):323-37.
- 538 33. DeZuane J. *Handbook of Drinking Water Quality*: Wiley; 1997.
- 539 34. Smith E, Stockwell JD, Schweitzer I, Langley SH, Smith AL. Evaluation of cage micro-  
540 environment of mice housed on various types of bedding materials. *Contemp Top Lab Anim Sci*.  
541 2004;43(4):12-7.
- 542 35. Ferrecchia CE, Jensen K, Van Andel R. Intracage ammonia levels in static and individually  
543 ventilated cages housing C57BL/6 mice on 4 bedding substrates. *J Am Assoc Lab Anim Sci*.  
544 2014;53(2):146-51.
- 545 36. Ras T, van de Ven M, Patterson-Kane EG, Nelson K. Rats' preferences for corn versus wood-  
546 based bedding and nesting materials. *Lab Anim*. 2002;36(4):420-5.
- 547 37. Krohn T, Hansen A. Evaluation of corncob as bedding for rodents. *Scan J Lab Anim Sci* 2008  
548 35(4):231-6.
- 549 38. Leys LJ, McGaraughty S, Radek RJ. Rats housed on corncob bedding show less slow-wave  
550 sleep. *J Am Assoc Lab Anim Sci*. 2012;51(6):764-8.
- 551 39. Markaverich B, Mani S, Alejandro MA, Mitchell A, Markaverich D, Brown T, et al. A novel  
552 endocrine-disrupting agent in corn with mitogenic activity in human breast and prostatic cancer cells.  
553 *Environ Health Perspect*. 2002;110(2):169-77.
- 554 40. Villalon Landeros R, Morisseau C, Yoo HJ, Fu SH, Hammock BD, Trainor BC. Corncob bedding  
555 alters the effects of estrogens on aggressive behavior and reduces estrogen receptor-alpha expression in  
556 the brain. *Endocrinology*. 2012;153(2):949-53.
- 557 41. Whiteside TE, Thigpen JE, Kissling GE, Grant MG, Forsythe D. Endotoxin, coliform, and dust  
558 levels in various types of rodent bedding. *J Am Assoc Lab Anim Sci*. 2010;49(2):184-9.

- 559 42. Drewes JE, Bellona C, Oedekoven M, Xu P, Kim T-U, Amy G. Rejection of wastewater-derived  
560 micropollutants in high-pressure membrane applications leading to indirect potable reuse. *Environmental*  
561 *Progress*. 2005;24(4):400-9.
- 562 43. Morris EK, Caruso T, Buscot F, Fischer M, Hancock C, Maier TS, et al. Choosing and using  
563 diversity indices: insights for ecological applications from the German Biodiversity Exploratories. *Ecol*  
564 *Evol*. 2014;4(18):3514-24.
- 565 44. Derrien M, Van Baarlen P, Hooiveld G, Norin E, Muller M, de Vos WM. Modulation of Mucosal  
566 Immune Response, Tolerance, and Proliferation in Mice Colonized by the Mucin-Degrader *Akkermansia*  
567 *muciniphila*. *Front Microbiol*. 2011;2:166.
- 568 45. Everard A, Belzer C, Geurts L, Ouwerkerk JP, Druart C, Bindels LB, et al. Cross-talk between  
569 *Akkermansia muciniphila* and intestinal epithelium controls diet-induced obesity. *Proc Natl Acad Sci U S*  
570 *A*. 2013;110(22):9066-71.
- 571 46. Ottman N, Reunanen J, Meijerink M, Pietila TE, Kainulainen V, Klievink J, et al. Pili-like proteins  
572 of *Akkermansia muciniphila* modulate host immune responses and gut barrier function. *PLoS One*.  
573 2017;12(3):e0173004.
- 574 47. Shin NR, Lee JC, Lee HY, Kim MS, Whon TW, Lee MS, et al. An increase in the *Akkermansia*  
575 spp. population induced by metformin treatment improves glucose homeostasis in diet-induced obese  
576 mice. *Gut*. 2014;63(5):727-35.
- 577 48. Tannock GW. A special fondness for lactobacilli. *Appl Environ Microbiol*. 2004;70(6):3189-94.
- 578 49. Livingston M, Loach D, Wilson M, Tannock GW, Baird M. Gut commensal *Lactobacillus reuteri*  
579 100-23 stimulates an immunoregulatory response. *Immunol Cell Biol*. 2010;88(1):99-102.
- 580 50. Bravo JA, Forsythe P, Chew MV, Escaravage E, Savignac HM, Dinan TG, et al. Ingestion of  
581 *Lactobacillus* strain regulates emotional behavior and central GABA receptor expression in a mouse via  
582 the vagus nerve. *Proc Natl Acad Sci U S A*. 2011;108(38):16050-5.
- 583 51. Ohsawa K, Uchida N, Ohki K, Nakamura Y, Yokogoshi H. *Lactobacillus helveticus*-fermented milk  
584 improves learning and memory in mice. *Nutr Neurosci*. 2015;18(5):232-40.
- 585 52. Liu WH, Chuang HL, Huang YT, Wu CC, Chou GT, Wang S, et al. Alteration of behavior and  
586 monoamine levels attributable to *Lactobacillus plantarum* PS128 in germ-free mice. *Behav Brain Res*.  
587 2016;298(Pt B):202-9.
- 588 53. Liu YW, Liu WH, Wu CC, Juan YC, Wu YC, Tsai HP, et al. Psychotropic effects of *Lactobacillus*  
589 *plantarum* PS128 in early life-stressed and naive adult mice. *Brain Res*. 2016;1631:1-12.
- 590 54. Kilkeny C, Browne W, Cuthill IC, Emerson M, Altman DG, Group NCRGW. Animal research:  
591 reporting in vivo experiments: the ARRIVE guidelines. *Br J Pharmacol*. 2010;160(7):1577-9.

592

## 593 **Supporting information**

594 **S1 Table. Water decontamination methods survey.** Survey sent via e-mail through

595 Compmed listserv on December 15, 2015.

596 **S1 Fig. Average relative abundance of operational taxonomic units (OTUs) in each group.**

597 Bar graphs representing the average relative abundance of OTUs in each group for (A) fecal

598 microbiota and (B) cecal microbiota. Each color represents a different OTU. Legend on right

599 represents OTUs with high (>1%) relative abundance.

600 **S2 Table. Fecal richness and diversity analysis.** Two-way ANOVA results of richness and  
601 diversity (Shannon and Simpson diversity indices) from fecal endpoint (Day 28) samples.  
602 Considered  $p < 0.05$  significant.

603 **S3 Table. Cecal richness and diversity analysis.** Two-way ANOVA results of richness and  
604 diversity (Shannon and Simpson diversity indices) from cecal samples. Considered  $p < 0.05$   
605 significant.

606 **S2 Fig. Hierarchical clustering of cecal samples using the most variable operational**  
607 **taxonomic units (OTUs).** Hierarchical clustering of the top 25 (lowest  $p$ -values corrected by  
608 false discovery rate) OTUs by one-way ANOVA of all cecal samples. Color intensity shows cube  
609 root transformed normalized abundance of OTUs in each sample. Color-coded bars at top  
610 represent bedding/water group (legend on right).

611 **S4 Table. Significantly different operational taxonomic units (OTUs).** Two-way ANOVA  
612 results of significantly different ( $p < 0.05$ ) OTUs. Calculated using cube root transformed  
613 normalized abundance of OTUs in each sample. Numbers represent false discovery rate  
614 adjusted  $p$ -values.

615

616 **S3 Fig. Changes of fecal microbiota from arrival to endpoint.** Principal coordinate analysis  
617 of all fecal samples at arrival (black circles) and all different endpoint groups (legend on right).  
618 One-way PERMANOVA of ranked Bray-Curtis similarity indices results shown.

A

Water Decontamination Technique Survey

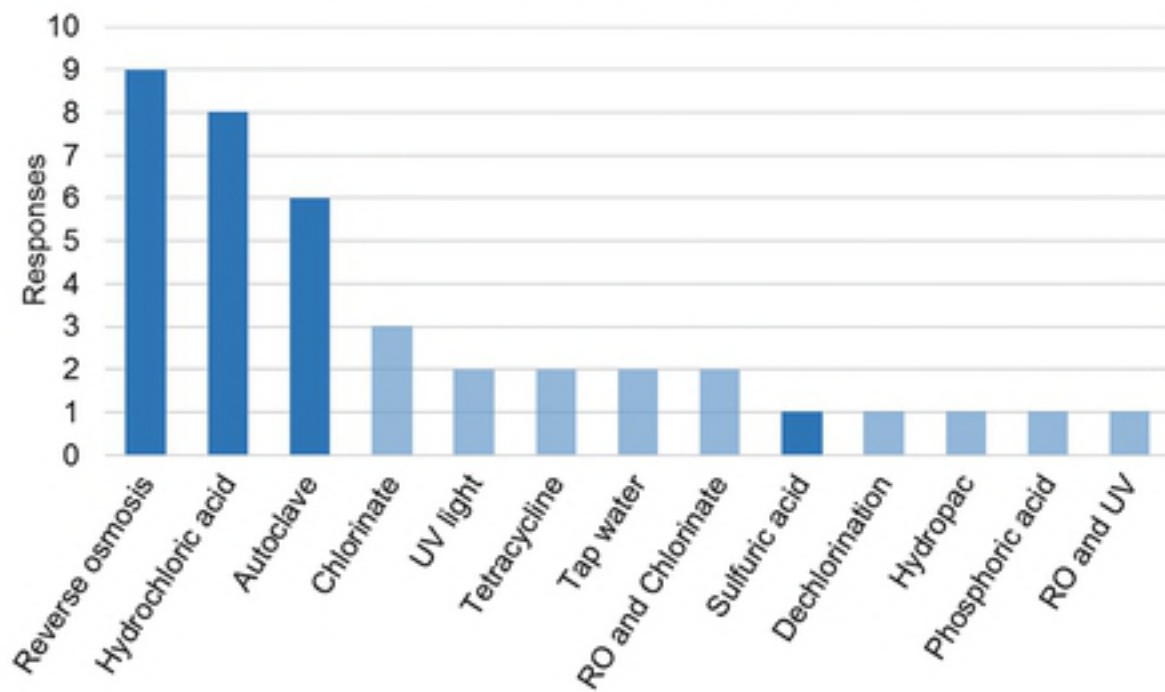

B

Bedding Material Survey

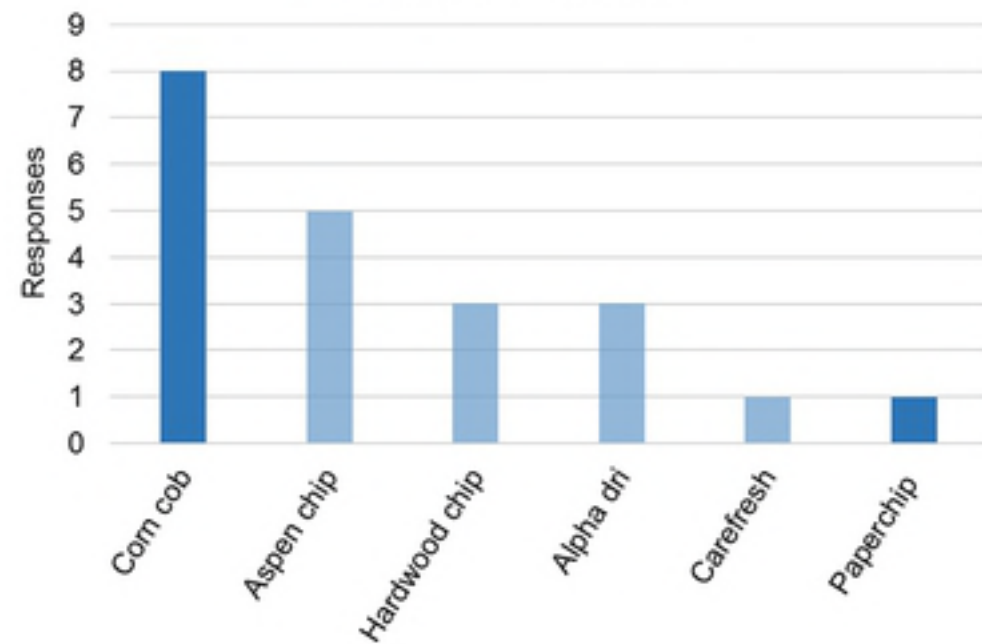



**A**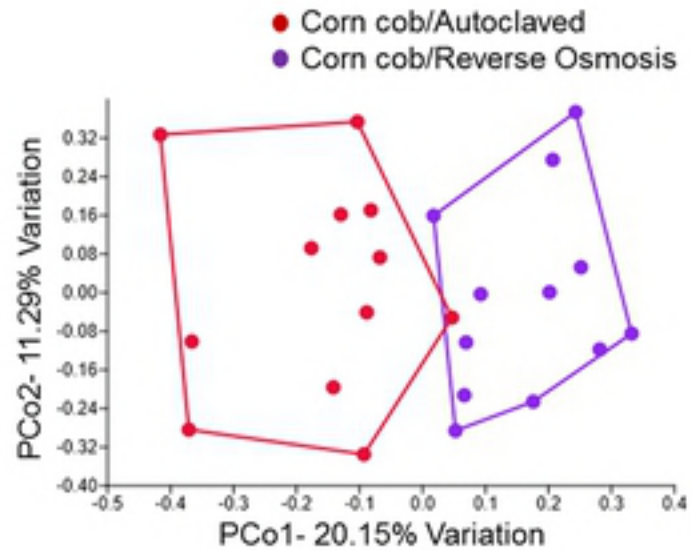**B**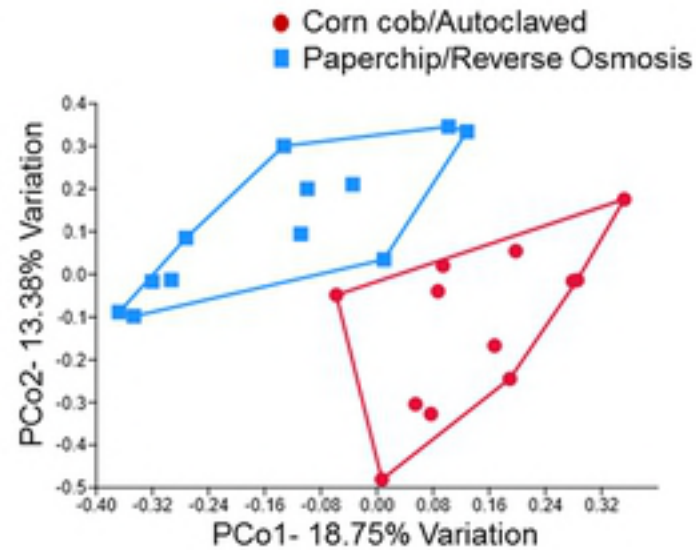**C**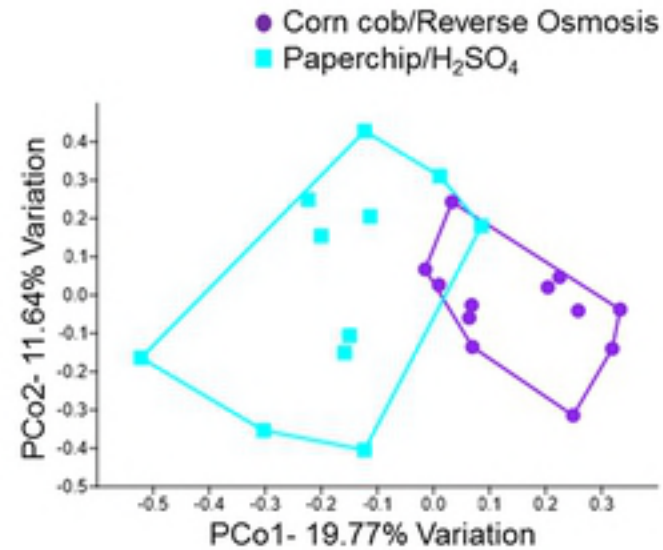

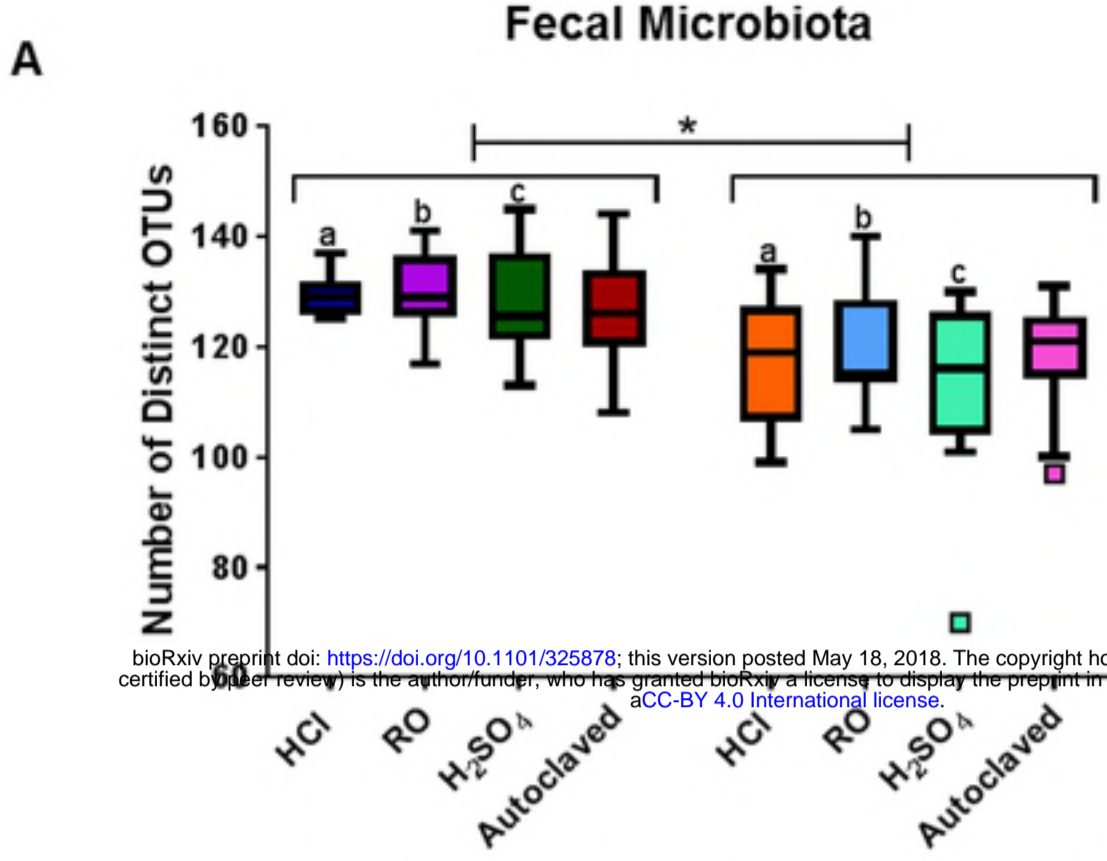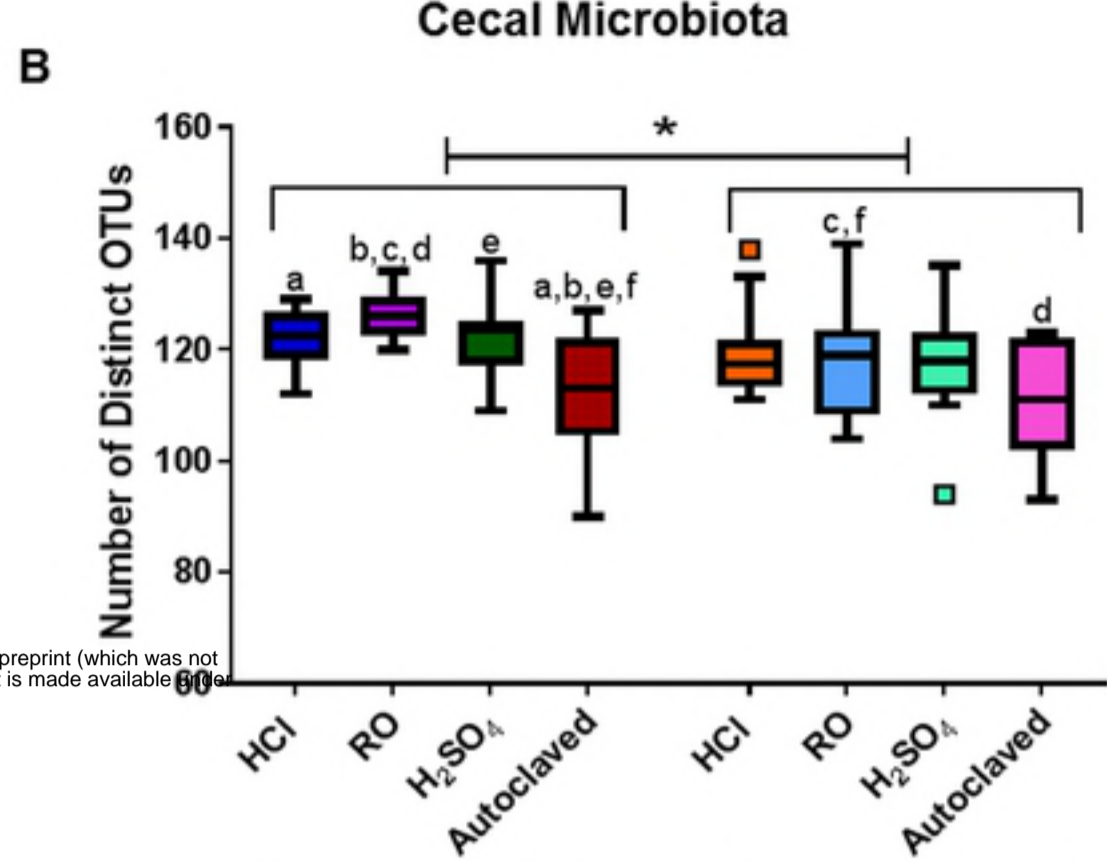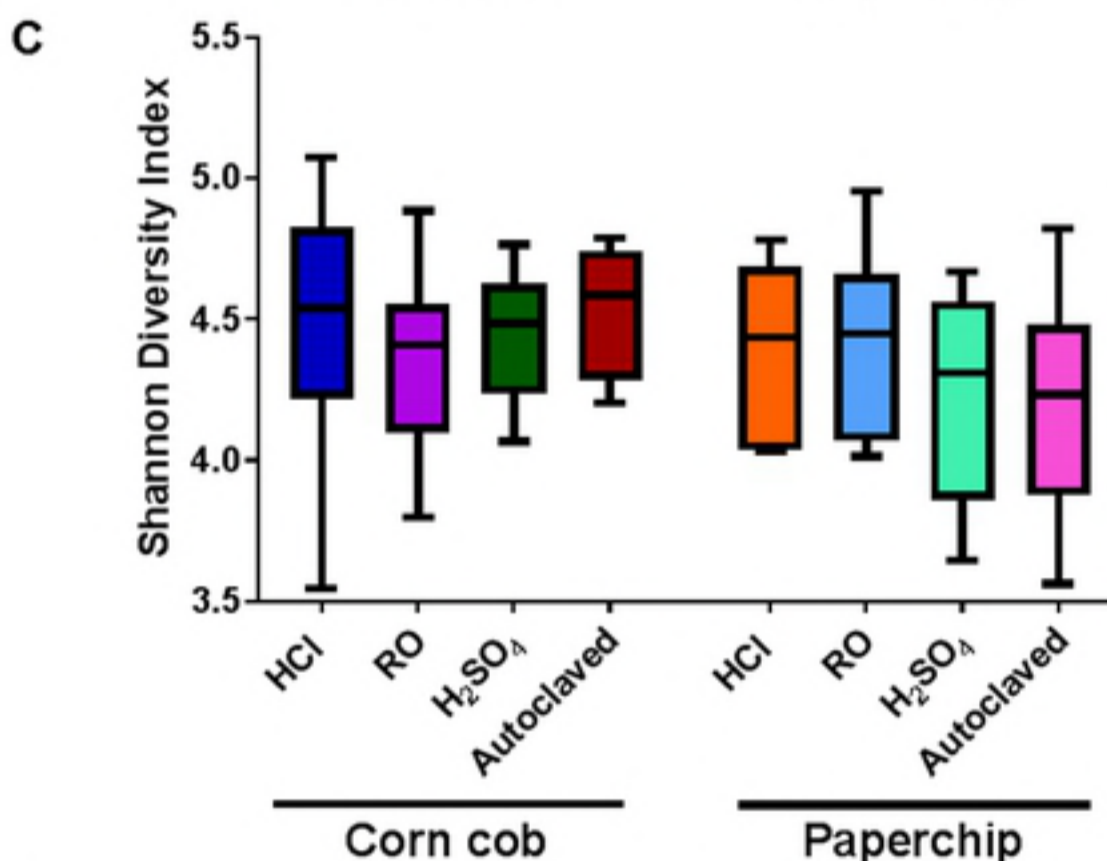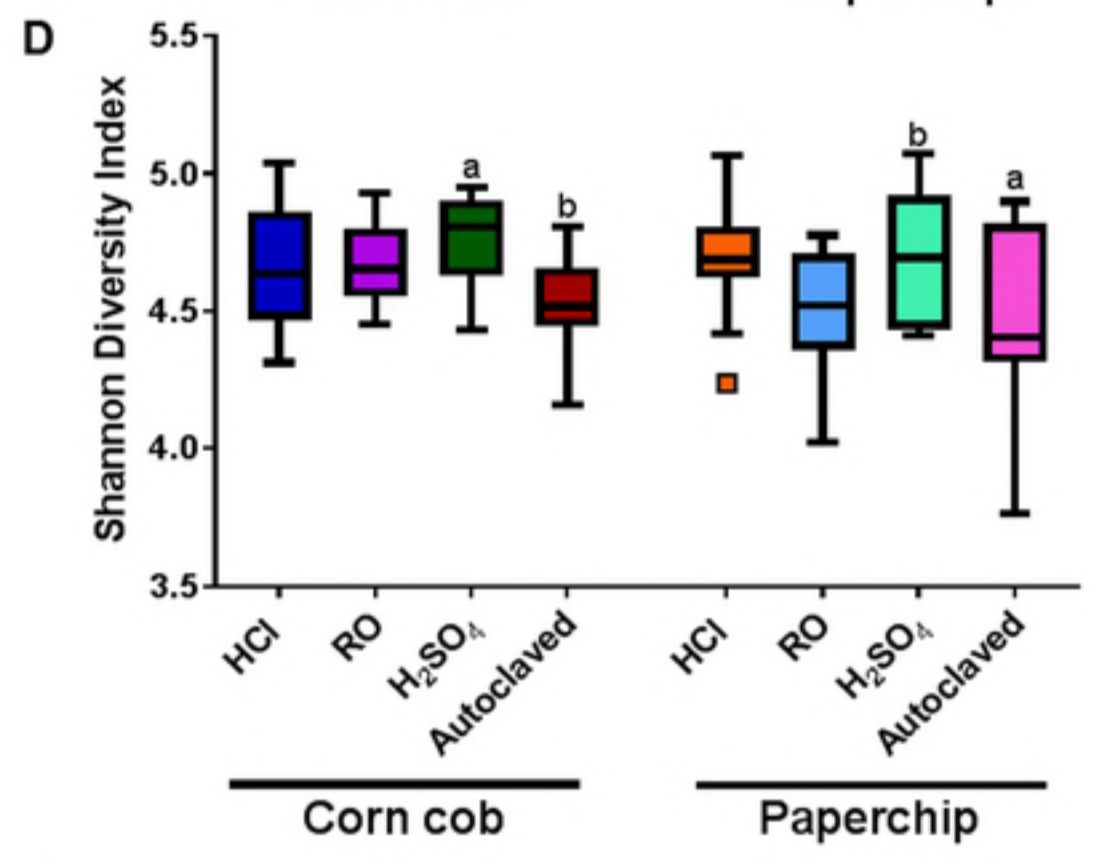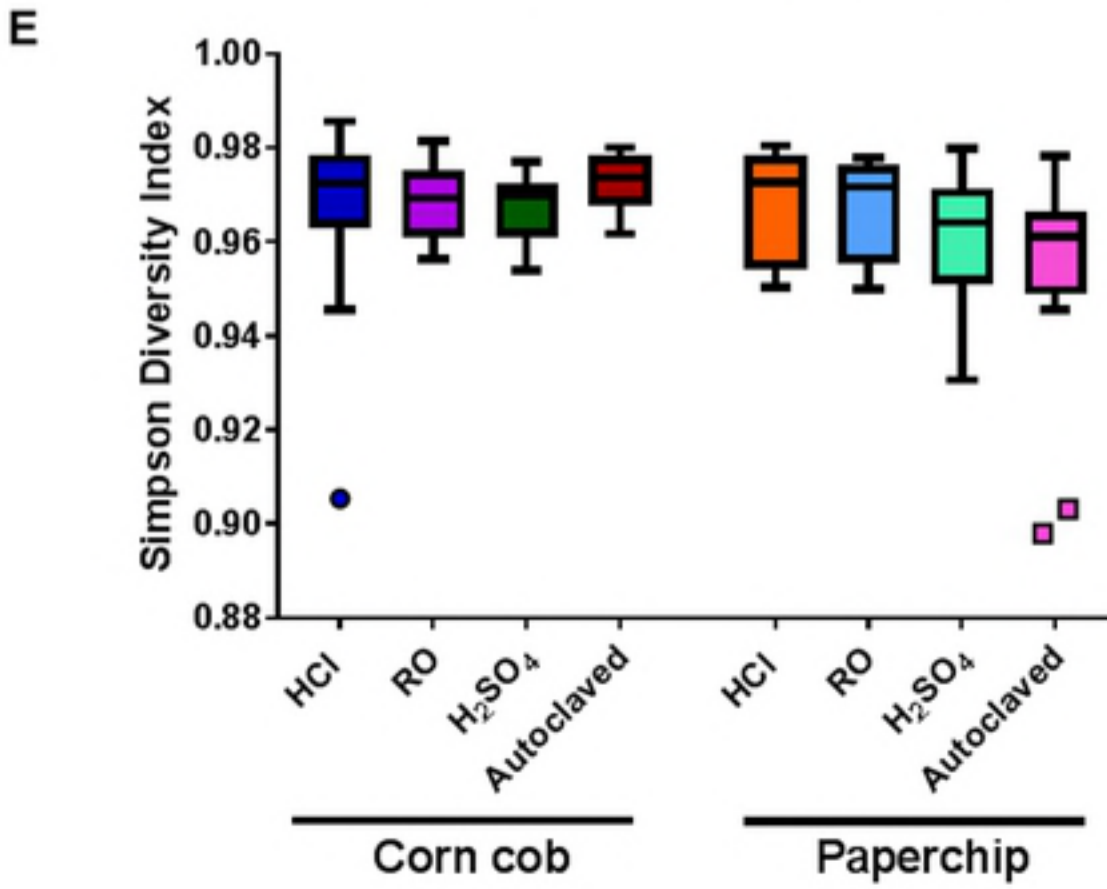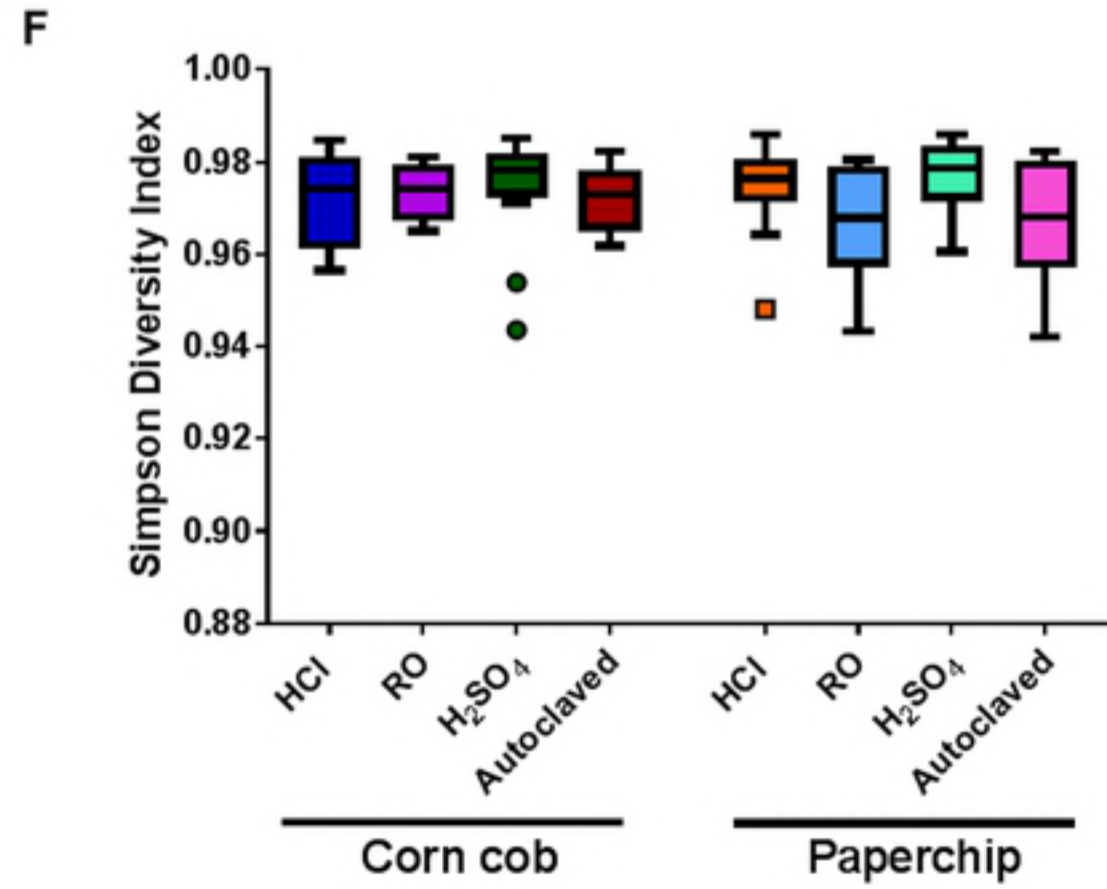

bioRxiv preprint doi: <https://doi.org/10.1101/325878>; this version posted May 18, 2018. The copyright holder for this preprint (which was not certified by peer review) is the author/funder, who has granted bioRxiv a license to display the preprint in perpetuity. It is made available under aCC-BY 4.0 International license.

High

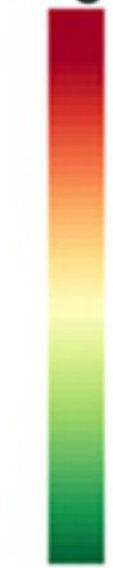

Low

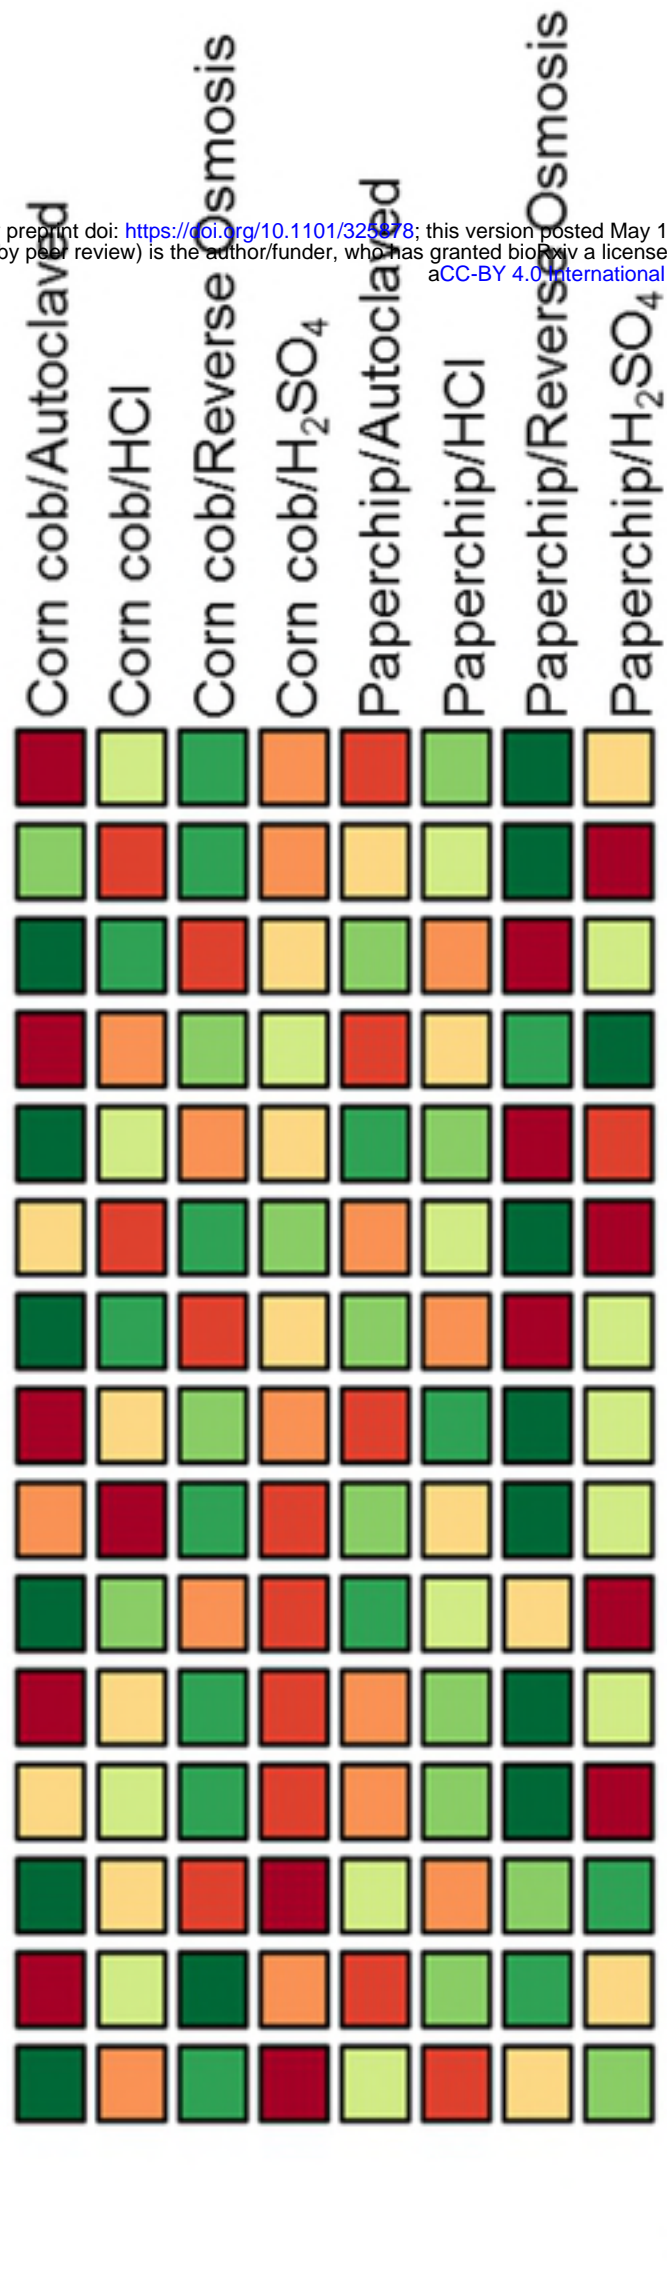

OTU #

Name

Family XIII UCG-001 sp.

*Lachnoclostridium* sp. 1

UC Family *Clostridiales* vadinBB60 group 1

*Akkermansia* sp.

*Ruminococcaceae* UCG-009 sp.

*Ruminiclostridium* 5 sp. 4

UC Family *Clostridiales* vadinBB60 group 3

UC Family *Peptococcaceae* 1

*Ruminiclostridium* 5 sp. 2

*Shuttleworthia* sp.

*Lactobacillus* sp.

*Enterorhabdus* sp.

UC Order *Mollicutes* RF9 1

*Anaerostipes* sp.

*Oryza meyeriana* sp.
